# Supplementary figures and images for: Astragaloside IV Attenuates Programmed Death-Ligand 1-Mediated Immunosuppression during Liver Cancer Development via the miR-135b-5p/CNDP1 Axis
Source: MDPI journal article supplement (doi:10.3390/cancers15205048), 2023-10-19

Supplementary whole western blot

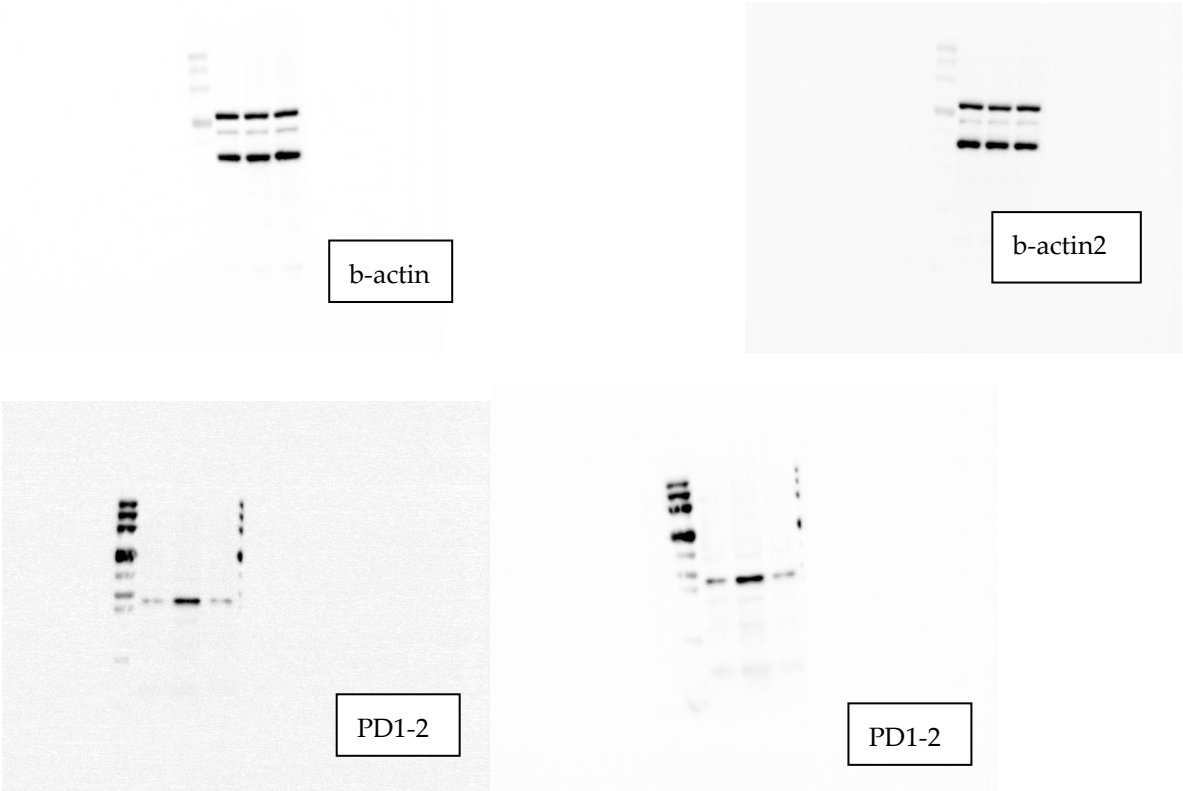

Figure 1.

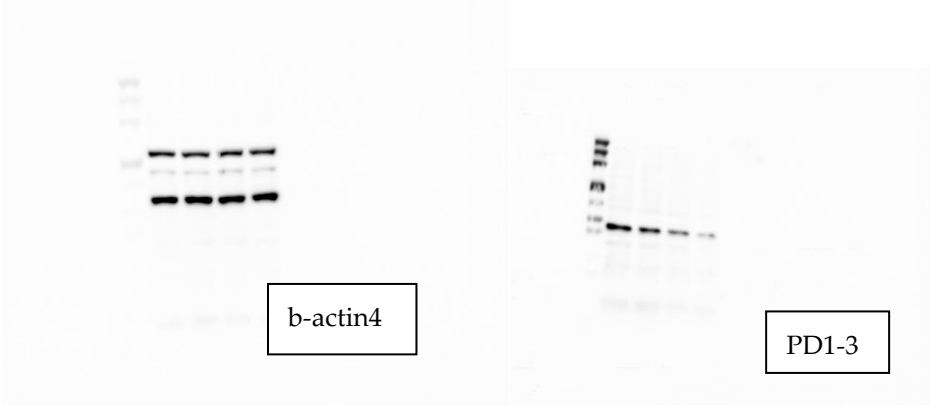

Figure 2

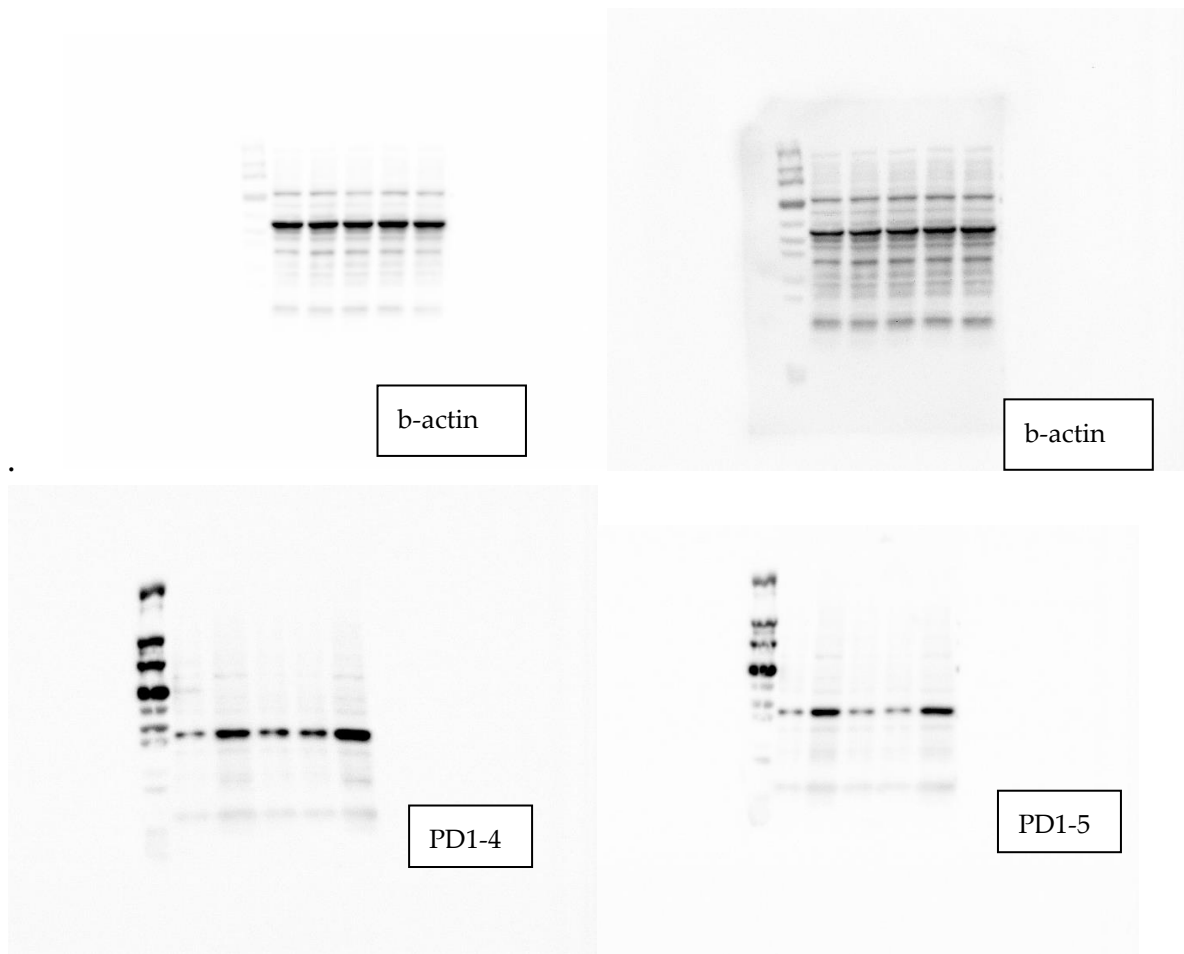

**Figure 4**

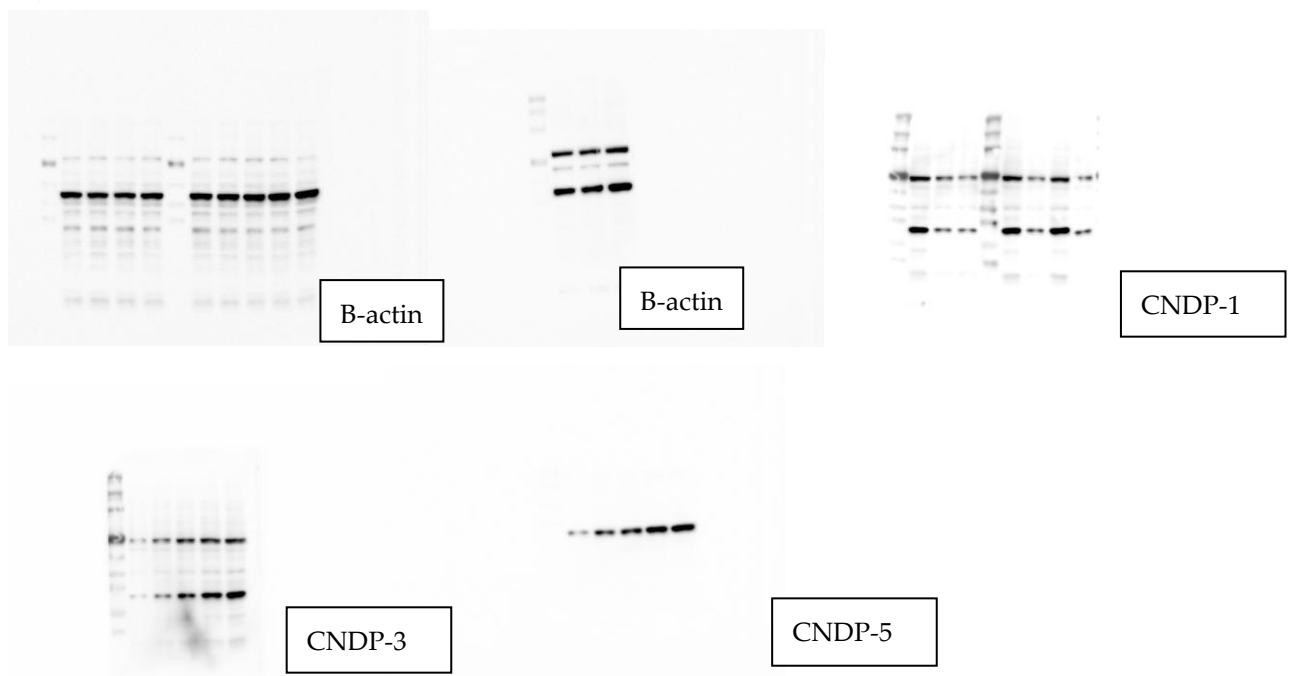

**Figure 5**

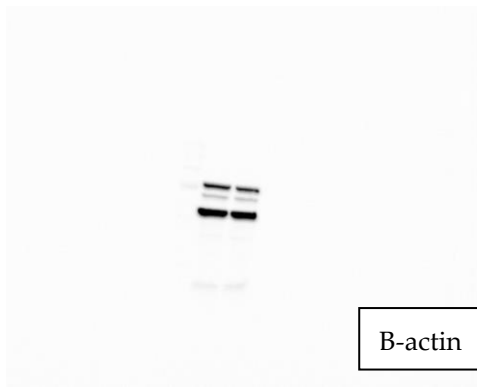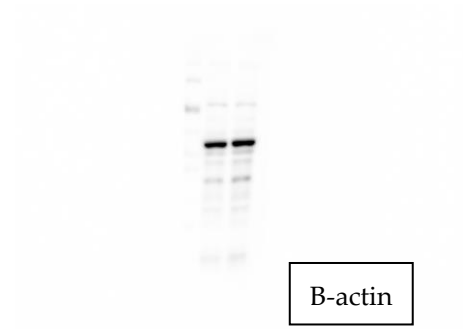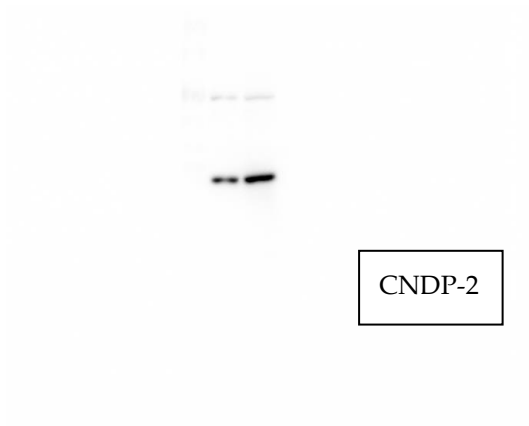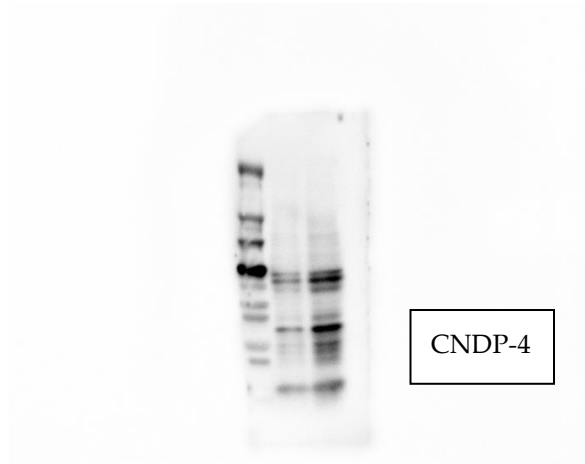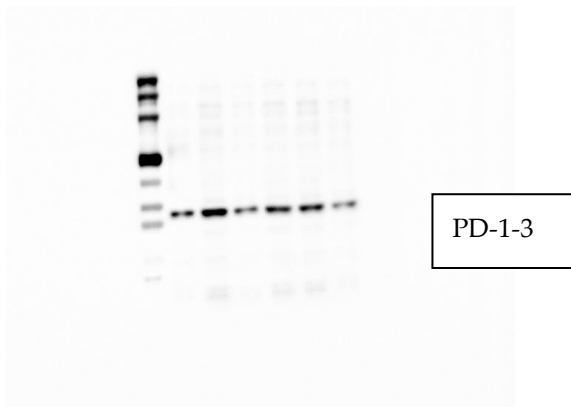

**Figure 6**

Supplement: s1 [file s1]
